# Supplementary material
Source: Royal Society of Chemistry journal article supplement (doi:10.1039/d6se00025h)
Supplement: d6se00025h3.xlsx [file d6se00025h3.xlsx]

## Sheet: Targets
	MW	HCratio	Density	NHC	TSI	IBP	FlashPt	FreezingPt	KV	DCN
FT-SPK	177.36	2.1576	0.7601			199.4	76.5	-49	5.626	67.08
AtJ	173	2.14754	0.757	43.9		166	47	-60	4.7	15.1
HEFA	176	2.14	0.762	43.9			44		1.5	59.1

## Sheet: ATR-FTIR
Wavenumber [cm-1]	649.921	650.162	650.403	650.644	650.885	651.126	651.367	651.608	651.849	652.09	652.331	652.572	652.813	653.055	653.296	653.537	653.778	654.019	654.26	654.501	654.742	654.983	655.224	655.465	655.706	655.947	656.188	656.43	656.671	656.912	657.153	657.394	657.635	657.876	658.117	658.358	658.599	658.84	659.081	659.322	659.563	659.804	660.046	660.287	660.528	660.769	661.01	661.251	661.492
FT-SPK	0.00134	0.00299	0.00446	0.00579	0.00704	0.00828	0.00949	0.0106	0.0115	0.012	0.012	0.0114	0.0103	0.00865	0.00666	0.00456	0.00262	0.0011	0.000197	-5.33e-06	0.000478	0.00153	0.00295	0.00453	0.00605	0.00731	0.00817	0.00855	0.00843	0.00785	0.00693	0.00579	0.00457	0.00343	0.00247	0.00176	0.00135	0.00126	0.00148	0.00198	0.00269	0.00352	0.00432	0.00497	0.00535	0.0054	0.00514	0.00463	0.00399
AtJ	0.0395	0.0399	0.0402	0.0403	0.0402	0.04	0.0397	0.0394	0.0393	0.0394	0.0397	0.0401	0.0404	0.0406	0.0406	0.0403	0.0398	0.0391	0.0384	0.0377	0.0371	0.0367	0.0363	0.0361	0.0359	0.0356	0.0354	0.035	0.0346	0.0342	0.0338	0.0335	0.0333	0.0332	0.0331	0.0331	0.0332	0.0334	0.0337	0.0342	0.0348	0.0354	0.0361	0.0366	0.0368	0.0367	0.0363	0.0357	0.0349
HEFA	0.014	0.0148	0.0155	0.0157	0.0156	0.015	0.014	0.0127	0.0111	0.00945	0.00761	0.00568	0.0038	0.00219	0.00113	0.000908	0.00163	0.0032	0.00527	0.00735	0.00895	0.00972	0.00957	0.00863	0.00722	0.00566	0.00421	0.00299	0.00199	0.00116	0.000508	8.35e-05	0	0.000347	0.00112	0.00219	0.00332	0.00425	0.0048	0.00492	0.0047	0.00438	0.00417	0.00423	0.00459	0.00518	0.00586	0.00649	0.00696
[truncated: 5,000 more columns]

## Sheet: Raman
Rel. Wavenumber [cm-1]	63.6605	68.6042	73.5453	78.4837	83.4194	88.3525	93.2828	98.2106	103.136	108.058	112.978	117.895	122.81	127.721	132.631	137.537	142.441	147.343	152.241	157.138	162.031	166.922	171.81	176.696	181.579	186.46	191.338	196.213	201.086	205.956	210.824	215.689	220.551	225.411	230.268	235.123	239.975	244.825	249.672	254.517	259.359	264.198	269.035	273.87	278.702	283.531	288.358	293.182	298.004
FT-SPK	1000	964	939	914	883	870	853	839	830	820	811	804	799	797	790	783	785	781	780	778	778	774	776	776	780	777	779	781	779	788	787	789	788	793	793	791	788	789	788	787	782	782	780	776	773	775	775	773	771
AtJ	1110	1050	1000	967	935	903	880	868	851	845	829	814	804	797	793	788	787	787	792	789	796	795	802	800	809	812	818	823	824	830	841	853	865	886	894	880	857	836	829	829	829	823	818	823	815	816	812	815	812
HEFA	1350	1270	1190	1120	1060	1020	976	945	906	891	867	852	835	828	814	806	798	792	788	785	785	784	786	786	789	791	796	797	804	807	809	818	821	826	830	824	826	819	819	815	817	811	805	810	805	799	790	786	786
[truncated: 975 more columns]
