# Supplementary material
Source: Royal Society of Chemistry journal article supplement (doi:10.1039/d6se00025h)
Supplement: d6se00025h4.pdf [file d6se00025h4.pdf]

## Supplementary Material for: SAFprop: A Dual Spectroscopic Approach for Predicting Properties of Sustainable Aviation Fuels

Mohammed Almomtán, Janardhanraj Subburaj, Emad Al Ibrahim,  
Mohamed Sy, El Mehdi Kharkhache, Danyaal Alam, and Aamir Farooq

April 18, 2026

### Supplementary Tables

**Table S1** Summary of previous studies on fuel property prediction utilizing infrared (IR) spectroscopy

| Ref.                                  | Spec. Type                                                                    | Spectral Source                                                                                                                   | Predicted Properties                                                                                                                       | Size                                     | Modeling Method                                                                   | Validation & Metrics                                                                                                                                                                                        |
|---------------------------------------|-------------------------------------------------------------------------------|-----------------------------------------------------------------------------------------------------------------------------------|--------------------------------------------------------------------------------------------------------------------------------------------|------------------------------------------|-----------------------------------------------------------------------------------|-------------------------------------------------------------------------------------------------------------------------------------------------------------------------------------------------------------|
| Almomtán <i>et al.</i> <sup>1</sup>   | ATR-FTIR (650–4000 cm <sup>-1</sup> )                                         | Measured for pure components, surrogate blends, and real fuels                                                                    | RON, MON, DCN                                                                                                                              | 757                                      | CNN + synthetic spectra blending, pseudo-labeling, synthetic data generation, UDA | OOD test on real fuels; MAE reduction up to 23.9%                                                                                                                                                           |
| Al Ibrahim and Farooq <sup>2</sup>    | FTIR (600–6500 cm <sup>-1</sup> )                                             | Measured gas-phase spectra for neat components (PNNL) and synthetic mole-fraction blending for mixtures and FACE/ FACE+EtOH fuels | RON, MON, octane sensitivity                                                                                                               | 247 (61 neat, 148 blends, 38 FACE/ EtOH) | ANN, SVM, PLSR; dimensional reduction via PCA/SVD                                 | 10-fold CV (ANN): RON MAE = 0.745, MON MAE = 1.056                                                                                                                                                          |
| Al Ibrahim and Farooq <sup>3</sup>    | FTIR (600–6500 cm <sup>-1</sup> )                                             | PNNL database (pure components); synthetic spectra for blends and real fuels using class-averaged compositions                    | DCN, C/H ratio                                                                                                                             | 236                                      | ANN, SVM, PLSR, Lasso regression                                                  | 10-fold CV (training) + external test set; ANN best: DCN MAE = 1.993 (CV), 1.105 (test); C/H MAE = 0.006 (CV), 0.004 (test); $R_{DCN}^2 = 0.972$ (CV), 0.993 (test); $R_{C/H}^2 = 0.959$ (CV), 0.990 (test) |
| Boddapati <i>et al.</i> <sup>4</sup>  | FTIR (2–15 μm, vapor-phase)                                                   | PNNL database; measured neat HCs, Jet A, SAFs (Stanford); synthetic HC blends                                                     | MW, H/C, Density, NHC, DCN, TSI, IBP, FlashPt, KV                                                                                          | 228                                      | Elastic-net regularized linear models (10-fold CV hyperparameter tuning)          | $R^2 > 0.95$ for all properties; MAE below ASTM reproducibility for 4 of 8 ASTM-traceable properties (H/C, NHC, TSI, IBP)                                                                                   |
| Mevik and Wehrens <sup>5</sup>        | NIR (900–1700 nm)                                                             | Measured for 60 gasoline samples                                                                                                  | Octane number                                                                                                                              | 60                                       | PLSR (kernel algorithm, pls package in R)                                         | LOO-CV on training set; 2 comps: RMSEP ≈ 0.297 (CV), 0.244 (test); $R^2 ≈ 0.97$ with 2 comps                                                                                                                |
| Kelly <i>et al.</i> <sup>6</sup>      | NIR (660–1215 nm)                                                             | 65 California gasolines (43 unleaded, 22 leaded) + 9 ASTM exchange samples                                                        | RON, MON, PON; RVP, API, S, Br no., aromatics, olefins, saturates                                                                          | 65 (+9)                                  | Stagewise MLR; PLS regression                                                     | Internal jackknife and subset tests; for unleaded PON, $R^2 ≈ 0.99$ with SE ~0.3–0.5 ON; for ASTM set, $R^2 ≥ 0.94$ (up to 0.999) with errors comparable to ASTM reproducibility                            |
| Kardamakís and Pasadakis <sup>7</sup> | FT-IR (4800–3520 cm <sup>-1</sup> ; NIR region)                               | Gasoline fractions from FCC and reformer units (Greek refinery)                                                                   | RON                                                                                                                                        | 384                                      | LPC + MLR                                                                         | 20% hold-out test set; RMSEP ≈ 0.33 RON, $R^2 ≈ 0.987$ ; no spectral pretreatment required with LPC                                                                                                         |
| Swarin and Drumm <sup>8</sup>         | NIR (900–1800, 1200–2400 nm; models over 1200–2400 nm)                        | 359 commercial gasolines from 23 U.S. cities                                                                                      | RON, MON, aromatics, olefins, saturates, SG, RVP, distillation parameters, ethanol, MTBE, gum                                              | 359                                      | Stepwise MLR (SMLR), PLS on absorbance and derivative spectra                     | External validation (269/90 split); R up to 0.999 (ethanol), 0.964 (RON), 0.959 (MON); SEP down to 0.097 vol% (ethanol)                                                                                     |
| Korolev <i>et al.</i> <sup>9</sup>    | NIR (880–1050 nm)                                                             | Commercial gasoline samples (A-92, A-76)                                                                                          | Octane number                                                                                                                              | Not specified                            | Linear regression on selected NIR wavelengths                                     | Std. deviation between predicted and reference ON: $W ≈ 0.09$ (A-92), 0.28 (A-76); potential accuracy ≤ 0.1 ON with high-precision absorbance measurements                                                  |
| Fodor <i>et al.</i> <sup>10</sup>     | FTIR-ATR (4000–650 cm <sup>-1</sup> )                                         | >800 commercial gasoline samples from a nationwide survey (all 50 U.S. states; summer and winter grades)                          | RON, MON, (R+M)/2, aromatics, olefins, saturates, benzene, ethanol, MTBE, total oxygen, distillation temps                                 | >800 (cal./ val. subsets per property)   | PLSR                                                                              | External validation; typical $R^2 ≈ 0.94–0.99$ for octane, hydrocarbon types, benzene, oxygenates; comparable to or better than ASTM reproducibility                                                        |
| Andrade <i>et al.</i> <sup>11</sup>   | FT-m.i.r. (600–4000 cm <sup>-1</sup> ; 1600–600 cm <sup>-1</sup> used)        | Measured for catalytic reformed naphthas from Spanish refineries                                                                  | RON, MON                                                                                                                                   | 310                                      | PLS (PLS-1 and PLS-2); spectral band selection; cross-validation                  | External validation; SEP ≈ 0.31–0.37 ON; repeatability and long-term precision better than ASTM engine methods; negligible systematic bias for most models                                                  |
| Daly <i>et al.</i> <sup>12</sup>      | ATR-FTIR (650–4500 cm <sup>-1</sup> )                                         | Neat hydrocarbons (6 primary + 28 additional) and 134 mixtures of the primary components measured via ATR-FTIR                    | RON                                                                                                                                        | 168 (34 neat + 134 mixtures)             | Principal Component Regression (PCR)                                              | External validation on 10 FACE gasolines and 12 FACE/ethanol blends; predictions within $0.3 ± 4.4$ RON, max residual 7.9 RON                                                                               |
| Alves <i>et al.</i> <sup>13</sup>     | NIR (flash: 3944–4769 cm <sup>-1</sup> ; cetane: 3500–4678 cm <sup>-1</sup> ) | Diesel oil samples from an in-line blending optimizer system                                                                      | Flash point, cetane number                                                                                                                 | 451 (flash point), 114 (cetane number)   | SVR (RBF kernel) vs. PLS; SVR hyperparameters optimized via genetic algorithm     | External validation; RMSEP = 1.98 °C (flash), 0.453 (cetane); SVR outperformed PLS; ASTM E1655 agreement: 95% (flash), 100% (cetane) for SVR                                                                |
| Wang <i>et al.</i> <sup>14</sup>      | FTIR (3300–3550 nm)                                                           | 22 jet fuels (Stanford), 18 pure HCs (PNNL); 24 constructed blends (total 64 fuels)                                               | Density, IBP, ST, KV, Total C, Total H, H/C, MW, NHC, DCN, IDT, LBO, FlashPt, C <sub>2</sub> H <sub>4</sub> yield, total cycloparaffin wt% | 64                                       | Lasso-regularized linear models using selected wavelengths                        | 10-fold CV; DCN CVE = 3.66 (7.9%); strong spectrum–property correlations (up to $R ≈ 0.95$ )                                                                                                                |

Continued on next page

Table S1 – continued from previous page

| Ref.                                  | Spec. Type                                                            | Spectral Source                                                                                                                      | Predicted Properties                                                                                                                            | Size                                                              | Modeling Method                                                                                                                                                 | Validation & Metrics                                                                                                                                                                                                                                                                                             |
|---------------------------------------|-----------------------------------------------------------------------|--------------------------------------------------------------------------------------------------------------------------------------|-------------------------------------------------------------------------------------------------------------------------------------------------|-------------------------------------------------------------------|-----------------------------------------------------------------------------------------------------------------------------------------------------------------|------------------------------------------------------------------------------------------------------------------------------------------------------------------------------------------------------------------------------------------------------------------------------------------------------------------|
| Boddapati <i>et al.</i> <sup>15</sup> | FTIR (2–15.38 $\mu\text{m}$ , gas-phase)                              | PNNL database neat hydrocarbons; Stanford neat hydrocarbons, distillate jet fuels, and AJs; 24 synthetic blends of pure hydrocarbons | IDT, NHC, DCN                                                                                                                                   | 74 total fuels (50 measured + 24 synthetic blends)                | Elastic-net regularized linear models with grid-searched ( $N, \alpha, \lambda$ )                                                                               | 10-fold CV for hyperparameter selection; improved accuracy vs. 3.4 $\mu\text{m}$ models; NHC model $R^2 \approx 0.96$ , MAE $\approx 0.15$ MJ/kg; DCN model $R^2 \approx 0.96$ with prediction errors on the order of ASTM reproducibility                                                                       |
| Dalmiya <i>et al.</i> <sup>16</sup>   | FTIR (650–4000 $\text{cm}^{-1}$ ; subset: 2400–800 $\text{cm}^{-1}$ ) | Measured for neat hydrocarbons, mixtures, real jet fuels                                                                             | DCN                                                                                                                                             | 88 (21 neat HCs, 49 mixtures, 10 real fuels, 8 blends)            | CNN, PLSR, Lasso, Random Forest; spectral reduction, baseline correction, feature filtering                                                                     | 10-fold CV + external test set (10 fuels); best CNN model (2400–800 $\text{cm}^{-1}$ ): $R^2 = 0.931$ , MPE = 3.0%, 80% within $\pm 2$ DCN, 100% within $\pm 10\%$                                                                                                                                               |
| Comesana <i>et al.</i> <sup>17</sup>  | FTIR (liquid-phase, 4000–650 $\text{cm}^{-1}$ )                       | Measured liquid-phase ATR-FTIR for 87 neat molecules, aviation fuels, and blends (literature + new measurements)                     | Final boiling point, flash point, freezing point, density@15°C, KV@–20°C                                                                        | 72 (FBP), 59 (FP), 70 (FrP), 69 (density), 31 (KV)                | NMF-extracted spectral features + ensemble models (Extra Trees, Random Forests)                                                                                 | 68/12/20% train/validation/test split; test MAE = 17.2, 9.6, 8.9, 22.2, 0.45; test RMSE = 26.4, 16.7, 15.9, 41, 0.66; MAPE as low as 2.7% (density)                                                                                                                                                              |
| Wu <i>et al.</i> <sup>18</sup>        | NIR (1000–1800 nm)                                                    | Measured for 813 commercial gasoline fuels from various regions in China                                                             | RON                                                                                                                                             | 813 (613 train / 200 test)                                        | ANN using PLS-derived latent variables (compared with PLSR baseline)                                                                                            | 10-fold CV on training set + external test set; best model (34 PLS factors): $R^2 = 0.97$ , AAE = 0.255, MAE = 1.367; ~94% of residuals within ASTM RON error range                                                                                                                                              |
| Wang <i>et al.</i> <sup>19</sup>      | NIR (900–1700 nm)                                                     | Standard dataset from Idaho State University (60 gasoline samples)                                                                   | Octane number                                                                                                                                   | 60                                                                | CME-L-Isomap + BAS-BP neural network                                                                                                                            | KS-based split (45/15); $R = 0.990$ , MSE = 0.058, MAPE = 0.119 (test); 30-run AR = 99.90–100.10%                                                                                                                                                                                                                |
| Morris <i>et al.</i> <sup>20</sup>    | NIR (950–1650 nm; 1000–1600 nm used)                                  | >800 jet and diesel fuels (Jet A/A-1, JP-5, JP-8, F-76, ULSD, MGO) plus selected FT and biofuel blends                               | Flash point, density (15°C), pour/ freeze point, viscosities, FSII, cetane index, aromatics, naphthalenes, saturates, distillation temperatures | >800 (varies by property)                                         | PLSR with standardized preprocessing, F-test-based LV selection, and permutation-based significance testing; calibration transfer between identical instruments | LOO-CV; $R^2$ up to 0.97 (density); several properties show RMSECV near or within ASTM repeatability, while others are limited by low RER or weaker correlations                                                                                                                                                 |
| Hradecká <i>et al.</i> <sup>21</sup>  | NIR (10,000–4,000 $\text{cm}^{-1}$ )                                  | >90 refinery middle distillate samples                                                                                               | Kinematic viscosity, CFPP, pour point, S, mono-/di-/poly-aromatics                                                                              | 50–70 (per property)                                              | PLS (TQ Analyst); raw spectra (1st derivative for S only)                                                                                                       | External validation (15 samples); $R^2$ up to 0.99; CFPP RSD 0.25%; max. CFPP error 2.61 °C                                                                                                                                                                                                                      |
| Feng <i>et al.</i> <sup>22</sup>      | NIR reflectance (750–1550 nm)                                         | Eigenvector SWRI dataset: 441 diesel samples from four grades                                                                        | Boiling point, cetane number, density, freezing temperature, total aromatics, viscosity                                                         | 441                                                               | PLSR with three schemes: (i) full-set PLS, (ii) LS-SVM-based group-wise PLS, (iii) LS-SVM-based group-wise PLS with DOSC                                        | Comparison of the three schemes using RMSECV, RMSEP and percentage error; e.g. full-set CN RMSEP = 12.085; grouped + DOSC models reduce prediction errors for most properties relative to full-set PLS                                                                                                           |
| Barra <i>et al.</i> <sup>23</sup>     | FTIR (4000–400 $\text{cm}^{-1}$ )                                     | Measured for 50 commercial diesel samples (Rabat, Morocco)                                                                           | Cetane number (CN)                                                                                                                              | 50                                                                | PLS regression; 3-step preprocessing (baseline correction, mean-centering, 1st derivative)                                                                      | External test set (40/10 split); $R^2 = 0.99$ , RMSEC = 0.28, RMSEP = 0.42                                                                                                                                                                                                                                       |
| Fodor <i>et al.</i> <sup>24</sup>     | ATR-FTIR (4000–650 $\text{cm}^{-1}$ )                                 | 684 middle distillates (diesel, JP-5, JP-8)                                                                                          | API, density, KV40, T50, CI, C/H, C, H, NHOC, aromatics (mono/di/poly/total)                                                                    | 684 (547 cal, 137 val)                                            | PLSR (mean-centered, baseline-uncorrected; 20 LVs)                                                                                                              | External val.; $R^2 \approx 0.99$ , SEP(min) $\sim 0.0006$ g/mL; 95% within ASTM reproducibility                                                                                                                                                                                                                 |
| Liu <i>et al.</i> <sup>25</sup>       | NIR (750–1550 nm)                                                     | Measured for 784 diesel samples (public SWRI dataset); 381–395 usable samples/property                                               | Density, viscosity, freezing point, boiling point, cetane number, total aromatics                                                               | 381–395                                                           | ISPYX ( $\lambda = 0.4$ ) + JGWO – SVR                                                                                                                          | Train/test split (70/30); $R^2$ up to 0.999 (viscosity), MAPE as low as 0.09% and MSE as low as $1.04 \times 10^{-6}$ (density); best performance among compared models (PLS, BP, SVR, GWO-SVR)                                                                                                                  |
| Rashid <i>et al.</i> <sup>26</sup>    | FTIR (Mid-IR, 4000–600 $\text{cm}^{-1}$ )                             | Measured for 376 hydrocarbon mixtures (10 pure hydrocarbons in 5–55 vol.% ranges)                                                    | RON, heat of formation, specific gravity, mole fraction of methyl groups (WCH <sub>3</sub> )                                                    | 376                                                               | Linear regression using IR absorbance ratios (least squares)                                                                                                    | Calibration and test statistics: for mixtures and gasolines, $r \approx 0.998$ (RON), 0.986 ( $\Delta H_f$ ), 0.993 (sp. gr.), 0.903 (WCH <sub>3</sub> ); standard error of calibration / performance $\sim 1.35/1.57$ RON, 1.11/2.00 kcal/mol ( $\Delta H_f$ ), 0.009/0.010 (sp. gr.), 0.01 (WCH <sub>3</sub> ) |
| Parisi <i>et al.</i> <sup>27</sup>    | NIR (600–1300 nm)                                                     | On-line fibre-optic probe in PDVSA refinery; lab NIR for PIONA and CN                                                                | RON, MON, PONA, CN                                                                                                                              | 28 (RON/MON); 16 (PONA); 26 (CN)                                  | PLS regression                                                                                                                                                  | RON/MON MD = 0.29/0.34; PONA rel. error <4%; CN MD = 0.77; within ASTM limits                                                                                                                                                                                                                                    |
| Asker and Kokot <sup>28</sup>         | NIR (7000–1557 $\text{cm}^{-1}$ ); 4800–4000 $\text{cm}^{-1}$ used    | Measured for 177 reformat samples (BP Bulwer Island Refinery, Australia)                                                             | RON                                                                                                                                             | 177 (65 for calibration, 112 for testing)                         | PCA + MLR (via CIRCOM software)                                                                                                                                 | External test set; $R^2 = 0.990$ , SEE = 0.330 (calibration); std. dev. = 0.554 (test); clustering based on crude origin improved prediction                                                                                                                                                                     |
| Job <i>et al.</i> <sup>29</sup>       | FTIR (4000–400 $\text{cm}^{-1}$ )                                     | Naphtha feed and reformat mixtures for reforming catalyst screening                                                                  | RON                                                                                                                                             | 13 (calibration mixtures; applied to additional reformat samples) | Third-degree polynomial using absorbance ratios from five mid-IR bands                                                                                          | Calibration: $R^2 \approx 0.998$ ; application to reformat samples: $R^2 \approx 0.95$ with typical deviations within $\pm 0.3$ RON vs. ASTM engine method                                                                                                                                                       |
| Bohács <i>et al.</i> <sup>30</sup>    | NIR (900–1700 nm)                                                     | Measured for 350 commercial gasoline samples (summer/winter grades; 91–98 RON; Hungarian and foreign sources)                        | RON, MON, benzene, MTBE                                                                                                                         | 350                                                               | PLSR (second derivative spectra, SESAME v2.0)                                                                                                                   | External validation set (20%); SEP = 0.34 (RON), 0.30 (MON), 0.13% (benzene), 0.21% (MTBE); $R > 0.97$ for all 4 properties; reproducibility matched standard tests                                                                                                                                              |

Continued on next page

Table S1 – continued from previous page

| Ref.                                   | Spec. Type                                                                      | Spectral Source                                                                                                                                      | Predicted Properties                                                                                                                                                                                      | Size                                        | Modeling Method                                                                                                                                                                                       | Validation & Metrics                                                                                                                                                                                                                                                            |
|----------------------------------------|---------------------------------------------------------------------------------|------------------------------------------------------------------------------------------------------------------------------------------------------|-----------------------------------------------------------------------------------------------------------------------------------------------------------------------------------------------------------|---------------------------------------------|-------------------------------------------------------------------------------------------------------------------------------------------------------------------------------------------------------|---------------------------------------------------------------------------------------------------------------------------------------------------------------------------------------------------------------------------------------------------------------------------------|
| Pavoni <i>et al.</i> <sup>31</sup>     | FT-IR (Mid-IR, 7 bands)                                                         | Measured for 93 refinery gasoline samples                                                                                                            | Density, RVP, RON, aromatics, T70                                                                                                                                                                         | 93                                          | Multivariate regression (PLSR likely)                                                                                                                                                                 | External validation; good prediction accuracy for all properties; performance comparable to ASTM methods with reduced analysis time and safer handling                                                                                                                          |
| Jeong <i>et al.</i> <sup>32</sup>      | NIR (1100–1650 & 1800–2100 nm)                                                  | Measured for 58 unleaded gasoline samples (blended from 9 feedstocks)                                                                                | RON                                                                                                                                                                                                       | 58                                          | MLR and Ridge Regression (4 selected wavelengths)                                                                                                                                                     | Calibration/ Validation split (43/15); SEP = 0.26 (MLR), 0.27 (RR); RR more robust to baseline variation (up to 0.20 RON SEP gain over MLR with perturbed spectra)                                                                                                              |
| Felício <i>et al.</i> <sup>33</sup>    | MIR (4000–600 cm <sup>-1</sup> ), NIR (9400–4500 cm <sup>-1</sup> )             | Measured for gasoline and gas oil samples from Petrogal refinery (Portugal)                                                                          | RON, benzene (gasoline); flash point (gas oil)                                                                                                                                                            | 188 (RON), 133 (benzene), 45 (flash point)  | Single PLS (MIR/NIR), Multiblock PLS, Serial PLS                                                                                                                                                      | LOOCV and repeated random 80/20 splits; Best RMSEP: 0.52 (RON, PLS-NIR), 6.41 × 10 <sup>-2</sup> (benzene, PLS-MIR), 2.95 °C (flash point, S-PLS); best models achieved Q <sub>v</sub> <sup>2</sup> > 85%.                                                                      |
| Brudzewski <i>et al.</i> <sup>34</sup> | GC + FTIR (4000–400 cm <sup>-1</sup> )                                          | 45 unleaded gasoline samples; GC for composition; FTIR using MAGNA-IR 750 NICOLET                                                                    | RON (regression; 6-class RON-based quality classification)                                                                                                                                                | 45                                          | Hybrid NN (Kohonen + MLP) and MLR for RON prediction from GC; SVM classifier with wavelet-based FTIR features for 6-class quality grouping                                                            | 35/10 train/test split; Hybrid NN test MAE = 0.275, RMS = 0.358; SVM classifier: 100% accuracy for 6 RON classes (train and test)                                                                                                                                               |
| Chung <i>et al.</i> <sup>35</sup>      | FT-NIR                                                                          | Gasoline, naphtha, and polyol samples                                                                                                                | RON, RVP (gasoline); D10% (naphtha); OH number (polyol)                                                                                                                                                   | 394 (gasoline), 215 (naphtha), 103 (polyol) | Moment Combined Partial Least Squares (MC-PLS)                                                                                                                                                        | Independent validation sets; SEPs: RON = 0.20, RVP = 1.04 kPa, D10% = 0.93 °C, OH number = 1.64 mg KOH g <sup>-1</sup> ; MC-PLS outperformed conventional PLS                                                                                                                   |
| Lysaght <i>et al.</i> <sup>36</sup>    | NIR (850–1500 nm; S.W. and L.W. regions)                                        | Measured for 33 JP-4 aviation fuel samples (round-robin with 5 labs)                                                                                 | Aromatics vol%, Saturates vol%, Freezing point                                                                                                                                                            | 33                                          | MLR, PLS on second-derivative spectra                                                                                                                                                                 | Leave-one-out CV; SEP ≤ 1.7% (aromatics/saturates), ≤ 4.98° (freezing point)                                                                                                                                                                                                    |
| Ichikawa <i>et al.</i> <sup>37</sup>   | FTIR (3150–2800 cm <sup>-1</sup> )                                              | Measured for 36 regular and 38 premium gasoline samples collected across seasons                                                                     | Octane number                                                                                                                                                                                             | 74                                          | Linear regression using absorbance in C–H stretching region                                                                                                                                           | Info unavailable (no quantitative validation metrics reported)                                                                                                                                                                                                                  |
| Garrigues <i>et al.</i> <sup>38</sup>  | FTIR (600–4000 cm <sup>-1</sup> ; 1400–680 cm <sup>-1</sup> used)               | Measured for 29 kerosene samples from Spanish refineries                                                                                             | Density, freezing point, flash point, aromatics, IBP, FBP, viscosity                                                                                                                                      | 29 (17 calibration, 12 test)                | MLR (stepwise/all), PCR, PLS                                                                                                                                                                          | External validation; PLS yielded best performance (e.g., density SEP = 0.0021 g/cm <sup>3</sup> , freezing point SEP = 1.6 °C); precision within ASTM reproducibility for most properties                                                                                       |
| Reboucas <i>et al.</i> <sup>39</sup>   | FT-NIR (666–2500 nm; 1670–1800 and 2100–2500 nm used)                           | Aromatics-rich C9 dihydrogenated stream and designed mixtures from pyrolysis gasoline treatment unit (Brazil)                                        | Relative density; TBP distillation temperatures at 10, 50, 90, 100% evaporated                                                                                                                            | 50 (calibration + external validation)      | PCA + PLS1/PLS2 multivariate calibration                                                                                                                                                              | LOO-CV and external validation; RMSEP 0.0005 (density), 0.49 (10%), 0.35 (50%), 0.58 (90%), 3.28 (100%); r <sup>2</sup> up to 0.998                                                                                                                                             |
| Özdemir <sup>40</sup>                  | NIR (900–1700 nm)                                                               | NIR diffuse reflectance spectra for 60 gasoline samples (Kalivas public dataset)                                                                     | Octane number                                                                                                                                                                                             | 60                                          | Genetic multivariate calibration: GR, GCLS, GILS                                                                                                                                                      | 20/ 20/ 20 cal./ pred./ val. split; GR and GILS: SEC/ SEP/ SEV = 0.15–0.32 ON with R <sup>2</sup> ≈ 0.99; GCLS less accurate (SEC = 0.36, SEP = 0.39, SEV = 0.52 ON, R <sup>2</sup> ≈ 0.95)                                                                                     |
| Al-Degs <i>et al.</i> <sup>41</sup>    | FTIR (MIR, 400–4000 cm <sup>-1</sup> )                                          | Measured for 100 petro-diesel samples from Jordan; used for chemometric modeling                                                                     | Higher Heating Value (HHV)                                                                                                                                                                                | 30 (20 cal., 10 val.)                       | PLS-1 for C/H prediction from MIR, empirical formula for HHV                                                                                                                                          | External validation; REP% = 0.26%; comparable to ASTM D240; t/F-test showed no significant difference                                                                                                                                                                           |
| Ahmed and Levenson <sup>42</sup>       | NIR (5000–9000 cm <sup>-1</sup> )                                               | Measured for ethanol and butanol blended gasoline (5–30% alcohol)                                                                                    | Alcohol content (vol.%)                                                                                                                                                                                   | 12 (6 ethanol, 6 butanol blends)            | PLS regression (Bruker QUANT software)                                                                                                                                                                | Calibration plots; R <sup>2</sup> = 0.9938 (ethanol), 0.9634 (butanol); quantification precision ±1%                                                                                                                                                                            |
| De Lira <i>et al.</i> <sup>43</sup>    | FTIR (MIR: 4000–600 cm <sup>-1</sup> , NIR: 12000–4000 cm <sup>-1</sup> )       | Measured for 161 diesel/biodiesel blends using conventional (Perkin-Elmer) and portable (Grabner Analyzer Irox Diesel) FTIR instruments              | Density, sulphur content, distillation points (T50%, T85%)                                                                                                                                                | 161 (86 calibration, 30 test, 10 transfer)  | PLSR; Calibration transfer via Direct Standardization (DS)                                                                                                                                            | External validation; RMSEP < ASTM reproducibility (except density); R ≥ 0.90 for most properties; DS transfer performance comparable to recalibration                                                                                                                           |
| Balabin and Safieva <sup>44</sup>      | NIR (9000–4500 cm <sup>-1</sup> ; 1110–2500 nm)                                 | Measured for 609 biodiesel samples from 21 feedstocks (industrial and lab-prepared)                                                                  | T <sub>50</sub> , T <sub>90</sub> , iodine value (IV), cold filter plugging point (CFPP)                                                                                                                  | 609 (488 training, 121 test)                | ANN, compared with MLR, PCR, PLS, Poly-PLS, Spline-PLS                                                                                                                                                | Independent test set; ANN RMSEPs: 1.7 °C (T <sub>50</sub> ), 1.8 °C (T <sub>90</sub> ), 0.90 g I <sub>2</sub> /100 g (IV), 0.77 °C (CFPP); ANN outperformed all others (RMSEP on average ~2.6× lower than PLS)                                                                  |
| Balabin and Smirnov <sup>45</sup>      | NIR (9000–4500 cm <sup>-1</sup> )                                               | Measured FT-NIR spectra for 612 biodiesel samples (103 industrial + 509 lab-prepared from 21 vegetable oils)                                         | Density, kinematic viscosity, methanol content, water content                                                                                                                                             | 612                                         | 16 VS methods benchmarked (MLR-step, iPLS, BiPLS, FIPLS, MWPLS, CSMWPLS, SCMWPLS, MCSMWPLSR, SPA, UVE, UVE-SPA, SA, BP-ANN, K-ANN, GA, GA-iPLS); MLR and PLS for calibration; ANN used for comparison | 490/122 split; 10-fold CV on calibration; independent test set; best VS-assisted models achieve RMSEP ≈ 0.64 kg/m <sup>3</sup> (density), 0.144 mm <sup>2</sup> /s (viscosity), 70 ppm (water), 84 ppm (methanol); feature selection reduces MLR prediction error by up to ~61% |
| Balabin and Lomakina <sup>46</sup>     | NIR (various ranges between 4000 and 14000 cm <sup>-1</sup> across 14 datasets) | Measured for gasoline, ethanol-gasoline, diesel, petroleum macromolecule and resin samples                                                           | Density, boiling points (IBP, T10, T50, T90, FBP), benzene, ethanol, sulfur, asphaltenes, resins, paraffins                                                                                               | 57–125 (14 datasets)                        | PLS, Poly-PLS, ANN, SVR, LS-SVM                                                                                                                                                                       | Independent validation sets (about 20% hold-out) with 5- or 10-fold CV for model tuning; SVM-based models achieve RMSEPs comparable to ANN and often lower than PLS/Poly-PLS, and are recommended for highly nonlinear systems such as petroleum macromolecules                 |
| Balabin and Smirnov <sup>47</sup>      | NIR (4000–14,000 cm <sup>-1</sup> )                                             | Measured for gasoline, ethanol-gasoline biofuel, diesel, aromatic petroleum macromolecules, petroleum resins in benzene, and biodiesel (18 datasets) | Density, IB, T10, T50, T90, FB, octane number, benzene and ethanol contents, total sulfur, flash point, viscosity, asphaltene/ resin/ paraffin contents, resin concentration, diesel content in biodiesel | 57–186 per property (18 datasets total)     | PLS, Poly-PLS, ANN, SVR, LS-SVM                                                                                                                                                                       | 20% hold-out validation; RMSEP reported for standard, interpolation, and extrapolation; robustness benchmarked with ANN least robust and LS-SVM/SVR most robust                                                                                                                 |

Continued on next page

Table S1 – continued from previous page

| Ref.                                          | Spec. Type                                                            | Spectral Source                                                                                                                                                     | Predicted Properties                                                                                                      | Size                                                         | Modeling Method                                                                                       | Validation & Metrics                                                                                                                                                                                                                                |
|-----------------------------------------------|-----------------------------------------------------------------------|---------------------------------------------------------------------------------------------------------------------------------------------------------------------|---------------------------------------------------------------------------------------------------------------------------|--------------------------------------------------------------|-------------------------------------------------------------------------------------------------------|-----------------------------------------------------------------------------------------------------------------------------------------------------------------------------------------------------------------------------------------------------|
| Balabin <i>et al.</i> <sup>48</sup>           | NIR (9000–4500 cm <sup>-1</sup> )                                     | Measured for 612 biodiesel samples from 21 feedstocks (industrial and lab-prepared)                                                                                 | Density (15 °C), kinematic viscosity (40 °C), water content, methanol content                                             | 612                                                          | ANN, compared with MLR, PCR, PLS, Poly-PLS, Spline-PLS; spectral pre-processing (SGD1/2-MC-OSC, etc.) | 10-fold CV (on 490 samples) + external test set (122 samples); best ANN RMSEPs: 0.42 kg/m <sup>3</sup> , 0.068 mm <sup>2</sup> /s, 45 ppm (H <sub>2</sub> O), 51 ppm (MeOH); ANN outperformed all others (up to 8.3× vs. MLR)                       |
| Balabin <i>et al.</i> <sup>49</sup>           | NIR (7500–14,500 cm <sup>-1</sup> )                                   | Measured for 200 gasoline samples and fractions from two Russian refineries (without additives)                                                                     | Density, IBP, T10, T50, T90, FBP                                                                                          | 200                                                          | MLR, PCR, PLS, Poly-PLS, Spline-PLS, ANN (all optimized)                                              | 10-fold CV; ANN lowest RMSECV (e.g., 2.0 kg/m <sup>3</sup> for density, 1.3–1.7°C for boiling points); ANN outperformed all others by 1.5–4× in prediction error                                                                                    |
| Bukkarapu and Krishnasamy <sup>50</sup>       | FTIR (range not specified)                                            | Measured for 70 biodiesel samples (from Camelina, Coconut, Karanja, Linseed, Palm oils; blended)                                                                    | Cetane number (CN)                                                                                                        | 70                                                           | Regression (based on peak absorbance and peak ratios)                                                 | External validation with unseen biodiesel data; Metrics: Mean Absolute Deviation (MAD), Mean Absolute Percentage Error (MAPE); proposed model showed good accuracy vs. existing models                                                              |
| Zanier-Szydłowski <i>et al.</i> <sup>51</sup> | NIR (6400–4500 cm <sup>-1</sup> )                                     | Measured for hydrotreated mid-distillates (gas oils, kerosenes)                                                                                                     | CN, refractive index, density, H content, aromatic carbon, mono-/di-/total aromatics                                      | 50–90 (varies by property)                                   | PLSR (Galactic PLSplus), baseline correction, cross-validation                                        | LOOCV; SEP: CN = 2, RI = 0.0004, Density = 0.4 kg/m <sup>3</sup> ; Precision ~ ASTM reproducibility or better for all modeled properties                                                                                                            |
| Cunha <i>et al.</i> <sup>52</sup>             | HATR/mid-FT-IR (4000–600 cm <sup>-1</sup> )                           | 148 biodiesel and blend samples (canola, sunflower, corn, soybean, commercial)                                                                                      | Density, refractive index, CFPP                                                                                           | 148 (100 calibration, 48 external)                           | PLS (density, RI), PLS/iPLS/SVM (CFPP); mean centering, 1st derivative, SNV                           | External validation; best RMSEP: 0.2 kg/m <sup>3</sup> (density, PLS), 0.0001 (RI, PLS), 0.6°C (CFPP, SVM); R <sub>pred</sub> <sup>2</sup> 0.95                                                                                                     |
| Pasquini and Bueno <sup>53</sup>              | NIR (3700–10000 cm <sup>-1</sup> ; best: 5000–3900 cm <sup>-1</sup> ) | Measured for 122 crude petroleum and blend samples (Brazil and abroad)                                                                                              | True Boiling Point (TBP) curve, API gravity                                                                               | 122                                                          | PLS, ANN (PCA-based inputs); baseline correction + normalization                                      | External validation (22 samples); Best PLS (5000–3900 cm <sup>-1</sup> ): TBP RMSEP = 1.13 V%, API RMSEP = 0.24, R <sub>API</sub> <sup>2</sup> = 0.923                                                                                              |
| Xing <i>et al.</i> <sup>54</sup>              | NIR (700–1100 nm; 875–1065 nm used)                                   | Measured for 44 aviation kerosene samples from 3 Chinese manufacturers                                                                                              | Kinematic viscosity                                                                                                       | 44 (34 calibration, 10 validation)                           | PLS regression with smoothing, mean-centering, and 2nd-derivative preprocessing                       | External validation; R <sup>2</sup> = 0.958, SEC = 0.012 mm <sup>2</sup> /s, SEP = 0.027 mm <sup>2</sup> /s; accuracy equivalent to ASTM D445                                                                                                       |
| Cooper <i>et al.</i> <sup>55</sup>            | NIR (880–1570 nm)                                                     | Measured for 820 jet fuels (JP8, Jet A-1, Jet A) using a handheld analyzer                                                                                          | API gravity, aromatics, cetane index, density, distillation temps, flash point, freeze point, hydrogen content, saturates | 820                                                          | PLSR with 7-point Savitzky–Golay first-derivative + SNV preprocessing                                 | LOO-CV and 25% external test set; SEP: 0.29 (API), 0.57 (cetane index), 0.002 (density); R <sup>2</sup> up to 0.99; repeatability and reproducibility comparable to or better than ASTM for most properties                                         |
| Cramer <i>et al.</i> <sup>56</sup>            | NIR (NFPM: 875–1575 nm; PFQA: 1000–1600 nm)                           | NFPM calibration on 1685 petrochemical jet/diesel fuels plus alternative fuels and blends on NFPM/PFQA prototypes                                                   | Key specification properties and alternative fuel contents                                                                | 1685 (per-property <i>N</i> varies; additional alt. samples) | PCA; PLS with F-test-based LV selection                                                               | Leave-one-out CV; RMSECV/RMSEP reported; cutoffs set to limit false positives                                                                                                                                                                       |
| Daly <i>et al.</i> <sup>57</sup>              | ATR-FTIR (650–4000 cm <sup>-1</sup> )                                 | Measured for 313 neat hydrocarbons and mixtures; FACE A–J fuels used for validation                                                                                 | LTC index (low-temperature combustion performance metric)                                                                 | 313                                                          | Support Vector Machine Regression (SVMR); Gaussian kernel; spectral preprocessing optimization        | 20-fold CV; FACE A–J external validation: most within ±3, all within ±6 LTC units; training R <sup>2</sup> ≈ 0.99                                                                                                                                   |
| Yang <i>et al.</i> <sup>58</sup>              | FTIR (6219 wavenumbers; range not specified)                          | 101 crude oil samples from 6 sources (Imperial Oil)                                                                                                                 | IVN, HVN, kerosene, distillate, VGO, residual fractions                                                                   | 101                                                          | PCA-SVR, Auto-SVR (autoencoder + SVR); PLSR and direct SVR as baselines                               | 65/36 train/test split; 5-fold CV on training; PCA-SVR test MAPE up to 11.13% (R <sup>2</sup> ≥ 0.936); Auto-SVR test MAPE up to 9.00% (R <sup>2</sup> ≥ 0.937); both generally show better accuracy and R <sup>2</sup> than PLSR and SVR baselines |
| Moro <i>et al.</i> <sup>59</sup>              | FTIR (650–4000 cm <sup>-1</sup> )                                     | Measured for 127 Brazilian crude oils (light to heavy)                                                                                                              | S, TN, BN, TAN, SAT, ARO, POL                                                                                             | 127                                                          | PLS (individual); mid-level data fusion with 1H and 13C NMR                                           | 30% test set; RMSEP = 0.064 wt% (S), 0.050 wt% (TN), 0.007 wt% (BN), 0.164 mgKOH/g (TAN); R <sup>2</sup> up to 0.98; mid-level fusion improved accuracy up to 58% over individual models                                                            |
| Rivera-Barrera <i>et al.</i> <sup>60</sup>    | ATR-FTIR (4000–400 cm <sup>-1</sup> )                                 | Measured for 26 Colombian crude oil samples                                                                                                                         | TAN                                                                                                                       | 26                                                           | PCR, PLSR (SIMPLS); PCA-based outlier analysis; airPLS baseline correction                            | Repeated 70/30 calibration/prediction splits over 10,000 realizations; best model: PLSR with 4 LVs; R <sub>pred</sub> <sup>2</sup> = 0.996, RMSEP = 0.160 mg KOH/g; reliable across TAN = 1.0–6.8 mg KOH/g                                          |
| Scheuermann <i>et al.</i> <sup>61</sup>       | FTIR (MIR, 650–1300 cm <sup>-1</sup> used)                            | Measured for 228 fossil/synthetic aviation fuel blends with varying compositions                                                                                    | Density, Flash point, Freezing point, Viscosity, Distillation (IBP, T10, T50, T90, FBP), Aromatic content                 | 228                                                          | PCA and PLS regression (Bruker OPUS + Unscrambler); GC×GC–MS aided interpretation                     | Cross-validation (leave-one-out); R <sup>2</sup> up to 0.9997 (density), MAE < 1 vol% for composition; prediction precision competitive with ASTM test methods                                                                                      |
| Tian <i>et al.</i> <sup>62</sup>              | NIR (780–2526 nm)                                                     | Measured for gasoline blending process samples (real refinery data)                                                                                                 | Octane number                                                                                                             | 466 (400 training, 66 test)                                  | SDAE-BP (stacked denoising autoencoder-initialized BP network)                                        | Train/validation/test strategy; best SDAE-BP (9-9-9-9) achieved R <sup>2</sup> = 0.9475, MSE = 0.02334; improved prediction accuracy and reduced training time vs. PCA-BP                                                                           |
| da Silva <i>et al.</i> <sup>63</sup>          | NIR (FTNIR: 1000–2500 nm; MicroNIR: 950–1650 nm)                      | 804 historical + 259 recent gasolines (FTNIR), 170 gasolines (MicroNIR), feedstock streams; gasoline spectra also simulated via linear coaddition of stream spectra | RON, MON                                                                                                                  | >1000 gasoline spectra + stream library                      | PLSR (separate FTNIR and MicroNIR models); octane simulator based on coadded stream spectra           | External validation: PLS models RMSEP ≈ 0.36–0.78; simulator RMSEP (sim vs. real) ≈ 0.72/0.64 (FTNIR MON/RON), 0.18/1.12 (MicroNIR MON/RON); generally comparable to ASTM reproducibility limits                                                    |
| Ferreiro-González <i>et al.</i> <sup>64</sup> | NIR (891–1812 nm); HS–MS (m/z 45–200)                                 | Measured for 60 gasoline samples (Spain, RON 95/98)                                                                                                                 | Research Octane Number (RON) classification                                                                               | 60                                                           | HCA, LDA (stepwise); fingerprinting via selected m/z and NIR wavelengths                              | Calibration/Validation split (50/50); 100% classification accuracy in both HS–MS and NIR models using LDA                                                                                                                                           |

Continued on next page

Table S1 – continued from previous page

| Ref.                                        | Spec. Type                                                                       | Spectral Source                                                                                                                  | Predicted Properties                                                                  | Size                                                       | Modeling Method                                                                                                                                    | Validation & Metrics                                                                                                                                                                                                          |
|---------------------------------------------|----------------------------------------------------------------------------------|----------------------------------------------------------------------------------------------------------------------------------|---------------------------------------------------------------------------------------|------------------------------------------------------------|----------------------------------------------------------------------------------------------------------------------------------------------------|-------------------------------------------------------------------------------------------------------------------------------------------------------------------------------------------------------------------------------|
| Macho and Larrechi <sup>65</sup>            | NIR (range not explicitly stated)                                                | Refinery and polymer industry samples (naphtha, polypropylene)                                                                   | Density; hydrocarbons (C6, C10 aromatics); ethylene content; viscosity                | 132 (naphtha); not specified (polypropylene)               | PLS, PCR (also MLR discussed); model maintenance strategies                                                                                        | RMSECV/RMSEP-based evaluation (e.g. density RMSECV 0.0028–0.0038); sample-specific confidence intervals (Faber–Kowalski); model updating and correction techniques reviewed                                                   |
| Gómez-Carracedo <i>et al.</i> <sup>66</sup> | FT-MIR vapour (4000–600 cm <sup>-1</sup> ; device-specific ranges)               | 100 refinery kerosenes (Spain), two vaporization devices                                                                         | Flash/ freezing points, IBP/ 10%/ 90%/ FBP, aromatics, viscosity                      | 100                                                        | PLSR with preprocessing; LV by CV                                                                                                                  | 50/50 split; SEP <sub>cor</sub> ≤ ASTM; mostly unbiased; improved precision vs. standard                                                                                                                                      |
| Fodor and Kohl <sup>67</sup>                | FTIR-ATR (4000–650 cm <sup>-1</sup> )                                            | 111 middle distillate fuels (DF-2, JP-5, JP-8, Jet A/A-1) with >200 fuels for external validation                                | Aromatics, C/H, heat of combustion, density, viscosity, cetane index                  | 111 calibration; >200 validation                           | PLS regression (PLSplus/ GRAMS/ 386); baseline-corrected spectra                                                                                   | External validation; R <sup>2</sup> ≈ 0.92–0.99; SEP ≈ 0.002 g/mL (density), 0.093 MJ/kg (heat), 0.934 (CCI); comparable to or better than ASTM reproducibility                                                               |
| Velvarská <i>et al.</i> <sup>68</sup>       | NIR (10,000–6450 cm <sup>-1</sup> )                                              | Measured for 133 calibration samples of diesel, biodiesel, and mixtures with FAME from RME, SFME, and UCOME (PetroOxy reference) | Oxidation stability (induction time)                                                  | 133 (calibration), 30 (external validation)                | PLS regression (TQ Analyst 9) on first-derivative spectra; 7 latent factors                                                                        | Internal: R = 0.9908, RMSEC = 4.50 min, RMSECV = 8.73 min; External (30 samples): max. abs. error = 7.95 min, RPD = 3.57, RER = 12.12; Repeatability: RSD = 8.59%                                                             |
| Vráblík <i>et al.</i> <sup>69</sup>         | NIR (5060–8343 cm <sup>-1</sup> )                                                | Measured for 133 diesel components (winter-grade, untreated) with 28 diesel blends for external validation                       | CFPP (cold filter plugging point)                                                     | 133 (calibration), 28 (validation)                         | PLSR (TQ Analyst 9); NIR model compared with d <sub>15</sub> +D86 and DSC-based models                                                             | External validation: R <sup>2</sup> = 0.9826, sum of squared errors = 60.0; max. absolute error ≈ 3°C; NIR model slightly less accurate than DSC and d <sub>15</sub> +D86 models but suitable for fast/online CFPP prediction |
| Liu <i>et al.</i> <sup>70</sup>             | NIR (750–1550 nm)                                                                | Public SWRI diesel dataset; 784 samples with 6 annotated properties (381–395 samples/property)                                   | Density, viscosity, freezing point, boiling point, cetane number, total aromatics     | 381–395                                                    | DEGWO-SVM with ISXPY (7:3 calibration/test)                                                                                                        | R <sup>2</sup> up to 0.999 (viscosity), MAPE down to 0.087% (density); consistently lower errors than SVM, GWO-SVM, and BP                                                                                                    |
| Wang <i>et al.</i> <sup>71</sup>            | NIR (750–1550 nm)                                                                | Public SWRI diesel NIR dataset; 784 samples from same oil field; summer-grade fuels; per property: 381–395 usable samples        | 50% distillation temperature, cetane number, viscosity, freezing temperature          | 381–395 (varies by property)                               | SVM with SCARS and CC wavelength selection; SG + 1st derivative (SG1d) preprocessing; Monte Carlo outlier detection; KS-based 4:1 train/test split | SCARS-SVM: test R <sup>2</sup> up to 0.997, RMSE ~0.06–1.49, MAPD down to 0.13; consistently higher accuracy, lower MAPD, and shorter runtime than CC-SVM                                                                     |
| Palou <i>et al.</i> <sup>72</sup>           | NIR (1000–2200 nm)                                                               | Measured for 278 post-blending biodiesel/diesel samples (CEPSA, Spain)                                                           | Density, Cetane Index, FAME content, Cloud Point, T95, Flash Point, Sulphur           | 278                                                        | PLS regression with calibration set selection via PCA + Kennard-Stone                                                                              | External validation; RMSEP ≤ reproducibility of reference methods; R <sup>2</sup> > 0.95 for most properties; model robust over 10 months of online use                                                                       |
| Pasadakis <i>et al.</i> <sup>73</sup>       | FTIR (Mid-IR, 4000–400 cm <sup>-1</sup> ; subset 1700–600 cm <sup>-1</sup> used) | 61 refinery diesel stream samples (feed, product, straight-run; Greece)                                                          | Distillation curve (IBP, 5–95% at 5% increments, FBP), PP, CP                         | 61                                                         | ANN (multi-layer feedforward); Group I: selected absorbances (1700–600 cm <sup>-1</sup> ); Group II: 1st-derivative FTIR + PCA (6 PCs)             | 85/15 train/test split; distillation SEP typically 0.5–2.3°C; PP SEP = 2.4°C; CP SEP = 3.1°C; performance comparable to ASTM repeatability                                                                                    |
| Baptista <i>et al.</i> <sup>74</sup>        | NIR (9000–4500 cm <sup>-1</sup> )                                                | Industrial and lab-scale biodiesel (palm, soybean, rapeseed, WFO); crude and purified biodiesel; oils included for density model | Iodine value, CFPP, kinematic viscosity (40 °C), density (15 °C)                      | 71–311 (per property: 311 IV, 71 CFPP, 144 KV, 91 density) | PCA for exploratory analysis; PLS regression with spectral pre-processing (SG derivatives, mean centering, OSC)                                    | Internal CV + external validation; RMSEP ≈ 0.8 (IV), 1.1 °C (CFPP), 0.09 mm <sup>2</sup> /s (KV), 0.9 kg/m <sup>3</sup> (density); external R <sup>2</sup> up to ~0.94 (CFPP/KV) and ~0.99 (IV/density)                       |
| Zhang <i>et al.</i> <sup>75</sup>           | FTIR (MIR: 550–1500 cm <sup>-1</sup> ); NIR (1100–1500, 1600–1700, 1800–2200 nm) | Biodiesel–diesel blends from 6 biodiesel types (SME, CME, PME, LME, PNME, OME) and 3 diesel fuels                                | Kinematic viscosity, Dynamic viscosity, Density                                       | 81 (55 calibration, 26 validation)                         | PLSR                                                                                                                                               | External validation; RMSEP: 0.114 mm <sup>2</sup> /s (MIR), 0.070 mm <sup>2</sup> /s (NIR) for kinematic viscosity; 0.119 mPa·s (MIR), 0.062 mPa·s (NIR) for dynamic viscosity; R <sup>2</sup> up to 0.9935 (NIR)             |
| Inan <i>et al.</i> <sup>76</sup>            | FTIR (4000–650 cm <sup>-1</sup> )                                                | 9 diesel sources + 2 diesel blends                                                                                               | 32 properties (density, viscosity, CN/CI, aromatics, distillation, NMR-based indices) | 69                                                         | PLS regression on baseline-uncorrected spectra                                                                                                     | Cross-validation with sample rotations; R <sup>2</sup> > 0.99 for most properties; RMSECV down to 5.55 × 10 <sup>-4</sup> g/cm <sup>3</sup> (density); validated on independent blends and validation subset                  |
| Chung <i>et al.</i> <sup>77</sup>           | NIR (1100–2500 nm), MIR (600–3500 cm <sup>-1</sup> )                             | Measured for 50 kerosene samples from 5 crude distillation units                                                                 | Distillation temperatures (IBP, 5–95% recovery points, EP)                            | 50                                                         | PLS regression (10-fold CV; no preprocessing)                                                                                                      | MSECV reported per recovery point; NIR outperformed MIR due to better SNR and reproducibility; best NIR MSECV ≈ 0.8–3.5°C vs. MIR ≈ 1.5–4.1°C                                                                                 |
| Reboucas and de Barros Neto <sup>78</sup>   | FT-NIR (1670–1800, 2100–2500 nm)                                                 | Measured for 50 aromatics-rich hydrocarbon mixtures (C9DI, PGH, C9 Mono) from pyrolysis gasoline units                           | Relative density; distillation parameters (10%, 50%, 90%, 100% evaporated)            | 50                                                         | PLS1 and PLS2 (with PCA for outlier detection)                                                                                                     | Leave-one-out CV; RMSEP: 0.0005 (density), 0.49 (10%), 0.35 (50%), 0.58 (90%), 3.28 (100%); r <sup>2</sup> up to 0.998; prediction within ASTM repeatability limits                                                           |
| Gonzaga and Pasquini <sup>79</sup>          | SW-NIR (850–1050 nm)                                                             | Measured for 93 diesel fuel samples (Brazilian refinery)                                                                         | Cetane Index (CI), T10, T50, T85, T90 (distillation temperatures)                     | 93                                                         | PLS regression; variable selection via jack-knife                                                                                                  | External validation; RMSEP = 0.5 (CI), 2.5–5.0°C (distillation); R > 0.80 for all, R = 0.93 (CI)                                                                                                                              |
| Honigs <i>et al.</i> <sup>80</sup>          | NIR (1250–2500 nm)                                                               | Measured for 90 synthetic mixtures of benzene, cyclohexane, isooctane, and n-heptane                                             | Heat of formation, Mean molecular weight, Methyl groups per molecule                  | 90                                                         | Multiple linear regression (row-reduction algorithm)                                                                                               | Separate calibration (42 samples) and test (48 samples) sets; r = 0.993 (heat), r = 0.986 (MW), r = 0.997 (CH <sub>3</sub> /mol); SE = 1.2 kcal/mol (heat), 1.5 g/mol (MW), 0.057 groups/mol (CH <sub>3</sub> )               |
| Honorato <i>et al.</i> <sup>81</sup>        | NIR (780–1600 nm; 10 mm, 1600–2500 nm; 1 mm), MIR (2500–15400 nm; ATR)           | 160 commercial C-type gasolines (Brazil; 25% v/v ethanol)                                                                        | Density, IDP, T10, T50, T90, FDP, MON, RON, PIONA splits                              | 160 (100 calibration, 30 validation, 30 test)              | PLS, PCR, MLR with GA/SPA variable selection and multiple preprocessing schemes; PCA of RMSEP values                                               | Best global setting: 1 mm NIR (1600–2500 nm) + GA + MLR; RMSEP values comparable to intermediate precision and below ASTM reproducibility for all properties except density                                                   |

Continued on next page

Table S1 – continued from previous page

| Ref.                                    | Spec. Type                                                  | Spectral Source                                                                                                                | Predicted Properties                                                                                          | Size                                                          | Modeling Method                                                                                              | Validation & Metrics                                                                                                                                                                                                             |
|-----------------------------------------|-------------------------------------------------------------|--------------------------------------------------------------------------------------------------------------------------------|---------------------------------------------------------------------------------------------------------------|---------------------------------------------------------------|--------------------------------------------------------------------------------------------------------------|----------------------------------------------------------------------------------------------------------------------------------------------------------------------------------------------------------------------------------|
| Mishra <i>et al.</i> <sup>82</sup>      | NIR (750–1550 nm)                                           | Measured for 395 diesel fuel samples (SWRI public dataset)                                                                     | Boiling point, Density, Aromatic mass, Viscosity                                                              | 395                                                           | SPORT (Sequential preprocessing through orthogonalization); compared to PLSR                                 | 60/40 KS split; SPORT: RMSEP reduced by 14–50%, bias removal; $R_p^2$ gain up to 8% vs PLSR                                                                                                                                      |
| Chen <i>et al.</i> <sup>83</sup>        | ATR-FTIR                                                    | Measured for 71 biodiesel samples produced from waste cooking oil                                                              | Unsaturated group content, O content, and contents of four representative esters (C19:4, C19:2, C17:1, C19:1) | 71                                                            | Hybrid ML framework: PCA for feature extraction; ANN, SVM/SVR, and RF used for classification and regression | Train/validation/test split (42/14/15); classification evaluated via accuracy, precision, recall, F1; regression via mean relative error (MRE) and Pearson correlation coefficient (average $r \approx 0.92$ for optimal models) |
| Chen <i>et al.</i> <sup>84</sup>        | ATR-FTIR (400–4000 $\text{cm}^{-1}$ )                       | Measured for 125 model bio-oil samples (mixtures of acetic acid, acetone, phenol, ethanol)                                     | Unsaturated concentration, effective hydrocarbon ratio, LHV, C, H, and O contents                             | 125                                                           | PCA-preprocessed SVR (kernel optimized per target)                                                           | 3:1:1 train/validation/test split; test accuracies 91.67–99.50%; most targets with $R \approx 0.9$ (PCA-SVR)                                                                                                                     |
| Mayer <sup>85</sup>                     | ATR-FTIR (650–4000 $\text{cm}^{-1}$ )                       | Pure hydrocarbons, surrogate blends, and F-24/bio-jet blends                                                                   | H/C ratio, $M_w$ , flash point, freezing point, cetane number                                                 | 214–224 (varies by property)                                  | Lasso-based feature selection; Lasso, Random Forest, AdaBoost                                                | 10-fold CV on training set; external holdout; best models $R^2 \approx 0.93$ –0.95                                                                                                                                               |
| Dalmiya <i>et al.</i> <sup>86</sup>     | ATR-FTIR and transmission FTIR (4000–650 $\text{cm}^{-1}$ ) | Liquid-phase spectra of jet fuels (Jet A, F-24, ATJ), ARL-CN surrogates, and HC blends; 106 unique samples (neat HCs excluded) | DCN                                                                                                           | 106; 351 (transmission) and 318 (ATR) spectra with replicates | MLR with data augmentation, lossless dimensionality reduction, and backward-elimination feature selection    | 10-fold CV + external test; ATR (full range): $R^2 = 0.888$ , MPE = 4.58%, 92% within $\pm 10\%$ ; transmission (2400–800 $\text{cm}^{-1}$ + FS): $R^2 = 0.911$ , MPE = 4.43%, 95% within $\pm 10\%$                             |
| Alizadeh <i>et al.</i> <sup>87</sup>    | FTIR (401–6996 $\text{cm}^{-1}$ )                           | Thermo Fisher FTIR microscope (107 Canadian crude oil samples)                                                                 | SG, KV, TAN, MCR, Sulphur, LVN, HVN, Kero, Distillate, Resid                                                  | 107                                                           | ANN (various architectures, up to 10 hidden layers; ReLU activations; dropout)                               | 80/20 train/test split, MAE & MAPE; $R^2$ up to 0.982; MAPE <15% for all except viscosity (improved using log transform)                                                                                                         |
| Bukkarapu and Krishnasamy <sup>88</sup> | ATR-FTIR (650–4000 $\text{cm}^{-1}$ )                       | Measured for 5 neat biodiesels and 70 calibration blends; additional 33 biodiesel samples for external validation              | Kinematic viscosity, density, higher calorific value, cetane number                                           | 70 (train) + 33 (validation)                                  | Full-spectrum PLS, functional-group-based MLR, ANN                                                           | External validation set; best MAPEs: 3.66% (viscosity), 0.73% (density), 2.75% (CV), 4.59% (CN)                                                                                                                                  |
| Wang <i>et al.</i> <sup>89</sup>        | NIR (FT-NIR, 10000–5000 $\text{cm}^{-1}$ )                  | Measured for blended gasoline samples (SINOPEC refinery)                                                                       | RON                                                                                                           | 455                                                           | PLSRR-ELM (hybrid PLS + ELM)                                                                                 | Independent test set (100 samples); $\text{RMSE}_T = 0.2275$ ; $R_p^2 = 0.9894$ ; Compared to PLS, ELM, ANN, etc.                                                                                                                |
| He <i>et al.</i> <sup>90</sup>          | NIR (1100–1300 nm)                                          | Industrial NIR spectra from gasoline blending unit (Guided Wave Model 412)                                                     | RON                                                                                                           | 750                                                           | ssGMM + PLS (semi-supervised Gaussian Mixture Model + Partial Least Squares)                                 | Comparison with LW-PLS, JITL-PLS, GMM-PLS; ssGMM-PLS achieved highest $R^2$ (0.9501) and lowest RMSE (0.1736)                                                                                                                    |
| Cunha <i>et al.</i> <sup>91</sup>       | NIR-FT-IR (10000–4000 $\text{cm}^{-1}$ )                    | NIR spectra of pure biodiesels and blends (soybean, canola, corn, sunflower, South Region)                                     | Kinematic viscosity at 40°C, CFPP                                                                             | 149                                                           | PLS, SVM, RF + variable selection (enPLS, sPLS, iPLS, VIP, GA, UVE)                                          | 100/49 calibration/external validation; best models: RMSEP = 0.0133 $\text{mm}^2/\text{s}$ (viscosity, UVE-PLS, deriv), 0.8°C (CFPP, SVM); SWTP used for model selection                                                         |
| Mohammadi <i>et al.</i> <sup>92</sup>   | ATR-FTIR (800–4000 $\text{cm}^{-1}$ )                       | Measured for 20 crude oil samples (each recorded 5 times)                                                                      | API gravity                                                                                                   | 100                                                           | PLS-R, SVM-R, PLS-DA                                                                                         | Full cross-validation; SVM-R: RMSEP = 2.452, $R^2 = 0.939$ ; PLS-DA: 100% classification accuracy                                                                                                                                |
| End of Table                            |                                                             |                                                                                                                                |                                                                                                               |                                                               |                                                                                                              |                                                                                                                                                                                                                                  |

Table S2 Summary of previous studies on fuel property prediction utilizing Raman spectroscopy

| Ref.                                   | Spec. Type                                                                                 | Spectral Source                                                                            | Predicted Properties                    | Size                                             | Modeling Method                                                                                   | Validation & Metrics                                                                                                                                                                                                                     |
|----------------------------------------|--------------------------------------------------------------------------------------------|--------------------------------------------------------------------------------------------|-----------------------------------------|--------------------------------------------------|---------------------------------------------------------------------------------------------------|------------------------------------------------------------------------------------------------------------------------------------------------------------------------------------------------------------------------------------------|
| Ambre <i>et al.</i> <sup>93</sup>      | Raman (500–3300 $\text{cm}^{-1}$ ; focus on 500–1800 $\text{cm}^{-1}$ )                    | Measured for 140 samples: jet fuels, ARL CN surrogate fuels, pure components, and mixtures | DCN                                     | 700 spectra (140 samples $\times$ 5 repetitions) | MLR, PLSR, RF, SVR, ANN, CNN; GS-based feature importance; S-G (2nd deriv.) + SNV preprocessing   | Dedicated external-style test set (Jet A-1/2/3 + 27 mixtures); ANN (500–1800 $\text{cm}^{-1}$ ) $R^2 = 0.926$ , MSE = 3.61 with 96.67% within 10%; GS-ANN (100 features) $R^2 = 0.935$ , MSE = 3.19 with 100% within 10% of measured DCN |
| Williams <i>et al.</i> <sup>94</sup>   | FT-Raman (near-IR, 4000–400 $\text{cm}^{-1}$ ; analysis range 3200–600 $\text{cm}^{-1}$ )  | Measured for 18 gas oil samples (54 spectra; 3 days)                                       | CN, CI                                  | 18 (54 spectra)                                  | CIRCOM (modified PCR with statistically significant PC selection)                                 | Cross-validated SEP: CN = 2.19, CI = 1.22; $R^2 = 0.77$ (CN), 0.93 (CI); consistent aliphatic vs. naphthalenic trends                                                                                                                    |
| Akulich <i>et al.</i> <sup>95</sup>    | Raman (181–3200 $\text{cm}^{-1}$ )                                                         | Measured for 49 fuel mixtures (245 spectra), using Raman spectroscopy                      | DCN                                     | 245                                              | SVR, Neural Network, Linear Regression; Feature selection via PCA, PLS, Ridge, RF, SHAP, LIME, GS | 3 scenarios (Control, Mixed, Real-time); best testing MSE = 4.6 (Fine-tuned SVR with RF-selected features, Real-time); Correctness metric for feature selection; generalization tested under noise and limited data                      |
| Cooper <i>et al.</i> <sup>96</sup>     | FT-Raman (196–3278 $\text{cm}^{-1}$ ; models use 196–1851 and 2510–3278 $\text{cm}^{-1}$ ) | Measured for 208 commercial petroleum fuels from Ashland Petroleum Co.                     | RON, MON, (R+M)/2, RVP                  | 208 (175 used in models)                         | PLS regression                                                                                    | LOOCV; SEV = 0.415 (MON), 0.535 (RON), 0.410 (Pump), 0.568 psi (RVP); Test set MAE $\approx$ 0.38 ON, 0.43 psi (RVP)                                                                                                                     |
| Flecher <i>et al.</i> <sup>97</sup>    | Dispersive Raman (650–1650 $\text{cm}^{-1}$ )                                              | Measured for 205 commercial gasoline samples (Ashland Petroleum)                           | RON, MON, Pump Octane, RVP              | 205 (130 train, 75 test)                         | PLS regression; preprocessing with mean centering, autoscaling, 1st derivative                    | Leave-one-out CV (train): SEV = 0.542 (Pump), 0.761 (RON), 0.434 (MON), 0.740 (RVP); Test SE = 0.586 (Pump), 0.773 (RON), 0.492 (MON), 0.869 (RVP); $R^2$ up to 0.969                                                                    |
| de Bakker and Fredericks <sup>98</sup> | FT-Raman (excitation via fiber-optic; range not specified)                                 | Measured for unleaded gasoline and reformat (in cuvettes)                                  | RON, MON, density, benzene content, FVI | 14–28 per model                                  | PLSR (partial least squares regression)                                                           | Cross-validation; $R^2 > 0.97$ (calibration); SEP: RON = 0.16, MON = 0.12, benzene = 0.09 vol%, density = 0.0018 $\text{g}/\text{cm}^3$                                                                                                  |

Continued on next page

Table S2 – continued from previous page

| Ref.                                | Spec. Type                                   | Spectral Source                                                                        | Predicted Properties                                                             | Size | Modeling Method                                                        | Validation & Metrics                                                                                                                                                                                                                                                  |
|-------------------------------------|----------------------------------------------|----------------------------------------------------------------------------------------|----------------------------------------------------------------------------------|------|------------------------------------------------------------------------|-----------------------------------------------------------------------------------------------------------------------------------------------------------------------------------------------------------------------------------------------------------------------|
| Andrade <i>et al.</i> <sup>99</sup> | FT-Raman<br>(193.5–1688.1 cm <sup>-1</sup> ) | Measured for 100 commercial civil kerosene samples from a Spanish refinery (1998–2000) | Abel flash point, IBP, 10% distillation temperature, FBP, viscosity, % aromatics | 100  | PLS regression (PLS1); unit normalization; fingerprint-region modeling | 50/50 cal/val split; corrected RMSEP ≈ 1.9 °C (flash), 2.3 °C (IBP), 1.0 °C (10%), 2.8 °C (FBP), 0.19 cSt (viscosity), 0.7% (aromatics); prediction errors comparable to or better than ASTM reproducibility; robust to laser power, vial, and positioning variations |
| End of Table                        |                                              |                                                                                        |                                                                                  |      |                                                                        |                                                                                                                                                                                                                                                                       |

Table S3 Summary of previous studies comparing infrared (IR) and Raman spectroscopy for fuel property prediction

| Ref.                                   | Spec. Type                                                                                                                           | Spectral Source                                                                                                                        | Predicted Properties                                                                                                                                    | Size                                               | Modeling Method                                                                                                         | Validation & Metrics                                                                                                                                                                                                                                          |
|----------------------------------------|--------------------------------------------------------------------------------------------------------------------------------------|----------------------------------------------------------------------------------------------------------------------------------------|---------------------------------------------------------------------------------------------------------------------------------------------------------|----------------------------------------------------|-------------------------------------------------------------------------------------------------------------------------|---------------------------------------------------------------------------------------------------------------------------------------------------------------------------------------------------------------------------------------------------------------|
| Bolanca <i>et al.</i> <sup>100</sup>   | FTIR-ATR<br>(4000–650 cm <sup>-1</sup> ),<br>FT-Raman<br>(3700–350 cm <sup>-1</sup> )                                                | Measured for 93 commercial diesel fuels (Croatia)                                                                                      | CN, CI, density, viscosity, T10, T50, T90, total aromatics, PAH                                                                                         | 93                                                 | MLP and RBF ANN; two-phase MLP training (BP + CG/QN); selected spectral bands as inputs                                 | Train/selection/test splits; for FTIR-ATR MLP, R ≈ 0.90–0.98 and mean errors within standard-method reproducibility (except density)                                                                                                                          |
| Santos <i>et al.</i> <sup>101</sup>    | FTIR-ATR<br>(650–4000 cm <sup>-1</sup> ),<br>FTNIR (ca.<br>4000–8300 cm <sup>-1</sup> ),<br>FT-Raman<br>(300–3500 cm <sup>-1</sup> ) | 90 diesel samples (PETROBRAS); separate calibration/validation sets for PLS (45/45) and ANN (60/30)                                    | Cetane index, density, viscosity, T50, T85, total sulfur                                                                                                | 90                                                 | PLS; ANN (modular feedforward networks)                                                                                 | External validation; FT-Raman+ANN with R <sup>2</sup> > 0.85 for all targets; total S RMSEP ~0.01% (w/w); ASTM reproducibility satisfied for most properties                                                                                                  |
| Marinović <i>et al.</i> <sup>102</sup> | FTIR-ATR<br>(650–4000 cm <sup>-1</sup> ),<br>FT-Raman<br>(3704–350 cm <sup>-1</sup> )                                                | Measured for 93 commercial diesel fuels (Croatia)                                                                                      | CN, CI, density, viscosity, T10, T50, T90, total aromatics, PAH                                                                                         | 93                                                 | PLSR on mean-centered raw spectra; up to 20 factors with RMSECV-based selection; spectral region optimization           | LOOCV; R <sup>2</sup> up to 0.99; RMSECV: 0.0739 (viscosity), 0.267 (CN), 2.5 °C (T10); most properties within ASTM reproducibility limits                                                                                                                    |
| Velvarská <i>et al.</i> <sup>103</sup> | NIR (unspecified range), Raman (unspecified range)                                                                                   | Measured for hydrogenated gas oil samples                                                                                              | Cetane index                                                                                                                                            | 55 (45 calibration, 10 validation)                 | Model correlation (unspecified method)                                                                                  | External validation (10 samples); Absolute error: NIR 0.3, Raman 1.2; CVE: NIR 0.334, Raman 0.654                                                                                                                                                             |
| Johnson <i>et al.</i> <sup>104</sup>   | NIR (1000–2300 nm), Raman (500–3500 cm <sup>-1</sup> )                                                                               | 45 jet fuels (Jet A/A-1, JP-8, JP-5; Raman on 30)                                                                                      | 28 specification properties (density, volatility, viscosity, aromatics, sulfur, etc.)                                                                   | 45 (30 Raman)                                      | PLS, PCR, N-PLS; standard preprocessing                                                                                 | Leave-one-out CV; key-property RMSECV < 10% of mean; PLS slightly better than PCR                                                                                                                                                                             |
| Voigt <i>et al.</i> <sup>105</sup>     | NMR (82 MHz), Raman (400–2300 cm <sup>-1</sup> ), FT-NIR (4000–10000 cm <sup>-1</sup> )                                              | 130 gasoline samples from refinery (CFR RON 89–104) for calibration/validation; 6 additional gas-station samples for external testing  | RON                                                                                                                                                     | 130 (+6 external)                                  | PCA (classification), PLS, SVR (rbf, linear); spectral preprocessing and band/region selection                          | 88/42 calibration/validation split; RMSEC = 0.19–0.71, RMSEP = 0.39–0.98; best NMR/SVR models give 80–90% of predictions within 0.7 RON                                                                                                                       |
| Cramer <i>et al.</i> <sup>106</sup>    | NIR (1000–2200 nm); FT-Raman (505–3502 cm <sup>-1</sup> , 1064 nm excitation)                                                        | >200 jet and diesel fuels (Jet A/A-1, JP-5, JP-8, JP-10, JPTS, F-76, ULSD; counts vary by property)                                    | Jet lubricity, jet viscosity, diesel viscosity, diesel cetane number (DCN)                                                                              | Up to 256 (varies by property)                     | SCRUWPLS (proposed) with iPLS-based initialization; compared against CSMWPLS and related PLS window methods             | Full cross-validation; best RMSEP ≈ 0.03289 (jet lubricity, NIR), 0.5041 (jet viscosity, NIR), 0.1900 (diesel viscosity, NIR), 1.001 (DCN, NIR); SCRUWPLS achieves similar or better errors with significantly reduced computation time vs. automated CSMWPLS |
| Kramer <i>et al.</i> <sup>107</sup>    | NIR (1000–2200 nm), Raman (505–3500 cm <sup>-1</sup> ), GC                                                                           | 43 jet fuels (Jet A, Jet A-1, JP-8, JP-5); 28 specification properties measured by ASTM methods                                        | 28 properties including density, flash point, freezing/pour point, sulfur, aromatics, H content, viscosity, refractive index, distillation temperatures | 43                                                 | PLSR with statistical significance testing (F-test for LV selection; RS and RE tests; Monte Carlo-based error analysis) | Leave-one-out CV; model significance assessed via F-test, permutation/randomization (RS), and Monte Carlo error estimation (RE); NIR and GC models found more statistically reliable than Raman models                                                        |
| Abraham <i>et al.</i> <sup>108</sup>   | Multiple (NDIR-IR/NIR, FTIR, ATR-FTIR, Dispersive NIR, Raman, QCL)                                                                   | Measured on 23 neat components + 79 mixtures; challenge set of 7 neat + 20 mixtures; external testing on real jet/SAF fuels and blends | DCN                                                                                                                                                     | 102 (base) + 27 (challenge); plus external testing | linear and non-linear ML with hyperparameter optimization                                                               | 10-fold CV + external testing; Raman: R <sup>2</sup> = 0.93, MPE=3.65%; QCL: R <sup>2</sup> = 0.90, MPE=4.15%; >95% within ±10% DCN error across technique                                                                                                    |
| Ku and Chung <sup>109</sup>            | NIR (1100–2500 nm), FT-Raman (3200–2500, 1700–190 cm <sup>-1</sup> )                                                                 | 50 naphtha samples                                                                                                                     | Paraffins, naphthenes, aromatics, C <sub>6</sub> paraffin, benzene, cyclopentane, specific gravity                                                      | 50 (35 cal, 15 val)                                | PLSR (no preprocessing)                                                                                                 | External validation; NIR SEP 0.016–0.141 vol%; NIR > Raman                                                                                                                                                                                                    |
| Chung and Ku <sup>110</sup>            | NIR (1100–2500 nm), IR (3500–600 cm <sup>-1</sup> ), Raman (1064 nm excitation)                                                      | Measured for 81 atmospheric residue (AR) samples from crude distillation                                                               | API gravity                                                                                                                                             | 81                                                 | PLS regression on raw and second-derivative NIR spectra; spectral range and factor selection via F-test on MSEC         | 51-sample calibration, 30-sample prediction set; best model SEP = 0.22; NIR repeatability ~3× better than ASTM; leave-one-out CV used for model selection                                                                                                     |
| End of Table                           |                                                                                                                                      |                                                                                                                                        |                                                                                                                                                         |                                                    |                                                                                                                         |                                                                                                                                                                                                                                                               |

Table S4 Summary of selected studies on fuel property prediction using Raman Spectroscopy.

| Ref.                                         | Spec. Type                                                                                | Spectral Source                                                                                                  | Predicted Properties                                                                | Size                    | Modeling Method                                  | Validation & Metrics                                                                                                                     |
|----------------------------------------------|-------------------------------------------------------------------------------------------|------------------------------------------------------------------------------------------------------------------|-------------------------------------------------------------------------------------|-------------------------|--------------------------------------------------|------------------------------------------------------------------------------------------------------------------------------------------|
| Okada and Sanders <sup>111</sup>             | FTIR (gas-phase, 600–6500 cm <sup>-1</sup> ), Raman (94–4400 cm <sup>-1</sup> ), IR+Raman | Simulated mixtures from reference spectra (PNNL IR, KnowItAll Raman); 237-species set and 41-species fuel subset | MW, density, Hc, DCN                                                                | 5000 synthetic mixtures | Constrained least-squares composition estimation | Mean absolute errors over 5000 mixtures; Raman up to 1.6× better than gas-phase IR; combined IR+Raman up to 3.4× better than Raman alone |
| Litani-Barzilai <i>et al.</i> <sup>112</sup> | NIR (700–1000 nm), LIF (250–500 nm)                                                       | On-line remote probe via optical fibers; gasoline samples from Texas (ca. 300) and Haifa (ca. 25)                | 10 properties incl. RON, MON, vapor pressure, API gravity, aromatics, MTBE, density | ~ 325                   | PCR and PLS on NIR and combined NIR+LIF spectra  | Hold-out validation; RON SEP = 0.36 (NIR) reduced to 0.17 with combined NIR+LIF (subset)                                                 |

Continued on next page

Table S4 – continued from previous page

| Ref.                             | Spec. Type                               | Spectral Source                                                                                                                 | Predicted Properties                              | Size                                                        | Modeling Method              | Validation & Metrics                                                                                                                                                                                                                                         |
|----------------------------------|------------------------------------------|---------------------------------------------------------------------------------------------------------------------------------|---------------------------------------------------|-------------------------------------------------------------|------------------------------|--------------------------------------------------------------------------------------------------------------------------------------------------------------------------------------------------------------------------------------------------------------|
| Tao <i>et al.</i> <sup>113</sup> | ATR-FTIR<br>(400–4000 cm <sup>-1</sup> ) | 155 model SAF mixtures of n-tetradecane, isooctane, ethylcyclohexane, and ethylbenzene (linear, branched, cyclic, aromatic HCs) | Flash point, H/C ratio, LHV, C content, H content | 155 (+10 extreme-condition samples for external validation) | PCA + SVR, ANN, RF (RF best) | 3:1:1 train/validation/test split with cross-validation and extreme-set validation; RF MRE down to 0.57% and up to 1.65% (depending on target), R <sup>2</sup> up to ≈ 0.96 (avg. ≈ 0.94); sensitivity analysis highlights PC10 and PC19 as most influential |
| End of Table                     |                                          |                                                                                                                                 |                                                   |                                                             |                              |                                                                                                                                                                                                                                                              |

## Notes and references

- [1] M. Almomtan, E. A. Ibrahim and A. Farooq, *Fuelprop: Fuel property prediction from ATR-FTIR spectroscopic data*, 2025, <https://arxiv.org/abs/2506.01601>.
- [2] E. Al Ibrahim and A. Farooq, *Energy & Fuels*, 2020, **34**, 817–826.
- [3] E. Al Ibrahim and A. Farooq, *Energy & Fuels*, 2021, **35**, 8141–8152.
- [4] V. Boddapati, A. M. Ferris and R. K. Hanson, *Fuel*, 2024, **356**, 129557.
- [5] B.-H. Mevik and R. Wehrens, *Journal of Statistical Software*, 2007, **18**, 517–523.
- [6] J. Kelly, C. Barlow, T. Jinguji and J. Callis, *Analytical chemistry*, 1989, **4**, 313–20.
- [7] A. A. Kardamakis and N. Pasadakis, *Fuel*, 2010, **89**, 158–161.
- [8] S. Swarin and C. Drumm, *SAE Technical Paper*, 1991, 313–20.
- [9] V. N. Korolev, A. V. Marugin and V. B. Tsaregradskii, *SAE Technical Paper*, 2000, **45**, 1177–1181.
- [10] G. E. Fodor, K. B. Kohl and R. L. Mason, *Anal. Chem.*, 1996, **68**, 23–30.
- [11] J. M. Andrade, S. Muniategui and D. Prada, *Fuel*, 1997, **76**, 1035–1042.
- [12] S. R. Daly, K. E. Niemeyer, W. J. Cannella and C. L. Hagen, *Fuel*, 2016, **183**, 359–365.
- [13] J. C. L. Alves, C. B. Henriques and R. J. Poppi, *Fuel*, 2012, **97**, 710–717.
- [14] Y. Wang, Y. Ding, W. Wei, Y. Cao, D. F. Davidson and R. K. Hanson, *Fuel*, 2019, **255**, 115715.
- [15] V. Boddapati, A. M. Ferris and R. K. Hanson, *Proceedings of the Combustion Institute*, 2023, **39**, 1347–1355.
- [16] A. Dalmiya, M. Sheyyab, J. M. Mehta, K. Brezinsky and P. Lynch, *Proceedings of the Combustion Institute*, 2022.
- [17] A. E. Comesana, S. S. Chen, K. E. Niemeyer and V. H. Rapp, *A Structured Framework for Predicting Sustainable Aviation Fuel Properties using Liquid-Phase FTIR and Machine Learning*, 2024, <https://arxiv.org/abs/2408.01530>.
- [18] Y. Wu, Y. Liu, X. Li, Z. Huang and D. Han, *Fuel*, 2022, **318**, 123543.
- [19] S. Wang, S. Liu, J. Zhang, X. Che, Z. Wang and D. Kong, *Spectrochimica Acta Part A: Molecular and Biomolecular Spectroscopy*, 2020, **228**, 117836.
- [20] R. E. Morris, M. H. Hammond, J. A. Cramer, K. J. Johnson, B. C. Giordano, K. E. Kramer and S. L. Rose-Pehrsson, *Energy & Fuels*, 2009, **23**, 1610–1618.
- [21] I. Hradecká, R. Velvarská, K. D. Jaklová and A. Vráblík, *Infrared Physics & Technology*, 2021, **119**, 103933.
- [22] F. Feng, Q. Wu and L. Zeng, *Spectrochimica Acta Part A: Molecular and Biomolecular Spectroscopy*, 2015, **149**, 271–278.
- [23] I. Barra, M. Kharbach, E. M. Qannari, M. Hanafi, Y. Cherrah and A. Bouklouze, *Vibrational Spectroscopy*, 2020, **111**, 103157.
- [24] G. Fodor, R. Mason and S. Hutzler, *Applied Spectroscopy*, 1999, **53**, 1292–1298.
- [25] S. Liu, S. Wang, C. Hu, X. Qin, J. Wang and D. Kong, *Measurement*, 2022, **187**, 110293.
- [26] H. A. Rashid, S. B. Dekran, N. A. Fakhri, H. J. Aziz and N. A. Hamoudi, *Fuel science & technology international*, 1989, **7**, 237–250.
- [27] A. Parisi, L. Nogueiras and H. Prieto, *Analytica Chimica Acta*, 1990, **238**, 95–100.
- [28] N. Asker and S. Kokot, *Applied spectroscopy*, 1991, **45**, 1153–1157.
- [29] A. Iob, M. A. Ali, B. S. Tawabini, J. A. Anabtawi, S. A. Ali and A. Al-Farayedhi, *Fuel*, 1995, **74**, 227–231.
- [30] G. Bohács, Z. Ovádi and A. Salgó, *Journal of near infrared spectroscopy*, 1998, **6**, 341–348.
- [31] B. Pavoni, N. Rado, R. Piazza and S. Frignani, *Annali di Chimica: Journal of Analytical, Environmental and Cultural Heritage Chemistry*, 2004, **94**, 521–532.
- [32] H. I. Jeong, H. S. Lee and J. H. Jeon, *Bulletin of the Korean Chemical Society*, 2001, **22**, 37–42.
- [33] C. C. Felício, L. P. Brás, J. A. Lopes, L. Cabrita and J. C. Menezes, *Chemometrics and Intelligent Laboratory Systems*, 2005, **78**, 74–80.
- [34] K. Brudzewski, A. Kesik, K. Kołodziejczyk, U. Zborowska and J. Ulaczyk, *Fuel*, 2006, **85**, 553–558.
- [35] H. Chung, S. Cho, Y. Toyoda, K. Nakano and M. Maeda, *Analyst*, 2006, **131**, 684–691.
- [36] M. J. Lysaght, J. J. Kelly and J. B. Callis, *Fuel*, 1993, **72**, 623–631.
- [37] M. Ichikawa, N. Nonaka, I. Takada and S. Ishimori, *Applied spectroscopy*, 1992, **46**, 966–971.
- [38] S. Garrigues, J. Andrade, M. de La Guardia and D. Prada, *Analytica chimica acta*, 1995, **317**, 95–105.
- [39] M. V. Reboucas, J. B. Santos, M. F. Pimentel and L. S. Teixeira, *Chemometrics and Intelligent Laboratory Systems*, 2011, **107**, 185–193.

- [40] D. Özdemir, *Petroleum science and technology*, 2005, **23**, 1139–1152.
- [41] Y. S. Al-Degs, M. Al-Ghouti and G. Walker, *Journal of thermal analysis and calorimetry*, 2012, **107**, 853–862.
- [42] M. K. Ahmed and J. Levenson, *Petroleum science and technology*, 2012, **30**, 115–121.
- [43] L. d. F. B. De Lira, F. V. C. De Vasconcelos, C. F. Pereira, A. P. S. Paim, L. Stragevitch and M. F. Pimentel, *Fuel*, 2010, **89**, 405–409.
- [44] R. M. Balabin and R. Z. Safieva, *Energy & Fuels*, 2011, **25**, 2373–2382.
- [45] R. M. Balabin and S. V. Smirnov, *Analytica chimica acta*, 2011, **692**, 63–72.
- [46] R. M. Balabin and E. I. Lomakina, *Analyst*, 2011, **136**, 1703–1712.
- [47] R. M. Balabin and S. V. Smirnov, *Analyst*, 2012, **137**, 1604–1610.
- [48] R. M. Balabin, E. I. Lomakina and R. Z. Safieva, *Fuel*, 2011, **90**, 2007–2015.
- [49] R. M. Balabin, R. Z. Safieva and E. I. Lomakina, *Chemometrics and intelligent laboratory systems*, 2007, **88**, 183–188.
- [50] K. R. Bukkarapu and A. Krishnasamy, *Fourier transform infrared spectroscopy models to predict cetane number of different biodiesels and their blends*, Sae technical paper technical report, 2020.
- [51] N. Zanier-Szydłowski, A. Quignard, F. Baco, H. Biguerd and L. Carpot, *Oil & Gas Science and Technology*, 1999, **54**, 463–472.
- [52] C. L. Cunha, A. S. Luna, R. C. Oliveira, G. M. Xavier, M. L. Paredes and A. R. Torres, *Fuel*, 2017, **204**, 185–194.
- [53] C. Pasquini and A. F. Bueno, *Fuel*, 2007, **86**, 1927–1934.
- [54] Z.-n. Xing, J.-x. Wang, Y. Ye and G. Shen, *Energy & fuels*, 2006, **20**, 2486–2488.
- [55] J. B. Cooper, C. M. Larkin, J. Schmitgal, R. E. Morris and M. F. Abdelkader, *Applied Spectroscopy*, 2010, **65**, 187–192.
- [56] J. A. Cramer, M. H. Hammond, K. M. Myers, I. A. Leska and R. E. Morris, *Energy & Fuels*, 2015, **29**, 7026–7035.
- [57] S. R. Daly, K. Tran, K. E. Niemeyer, W. J. Cannella and C. L. Hagen, *Fuel*, 2019, **242**, 343–344.
- [58] S.-B. Yang, J. Moreira and Z. Li, *Digital Chemical Engineering*, 2022, **3**, 100031.
- [59] M. K. Moro, Á. C. Neto, V. Lacerda Jr, W. Romão, L. S. Chinelatto Jr, E. V. Castro and P. R. Filgueiras, *Fuel*, 2020, **263**, 116721.
- [60] D. Rivera-Barrera, H. Rueda-Chacón and D. Molina, *Talanta*, 2020, **206**, 120186.
- [61] S. Scheuermann, S. Forster and S. Eibl, *Energy & Fuels*, 2017, **31**, 2934–2943.
- [62] Y. Tian, X. You and X. Huang, *Symmetry*, 2018, **10**, 770.
- [63] N. C. da Silva, A. R. C. de Góes Massa, D. Domingos, J. M. Amigo, M. das Virgens Rebouças, C. Pasquini and M. F. Pimentel, *Fuel*, 2019, **243**, 381–389.
- [64] M. Ferreira-González, J. Ayuso, J. A. Álvarez, M. Palma and C. G. Barroso, *Fuel*, 2015, **153**, 402–407.
- [65] S. Macho and M. Larrechi, *TrAC Trends in Analytical Chemistry*, 2002, **21**, 799–806.
- [66] M. Gómez-Carracedo, J. Andrade, M. Calvino, E. Fernández, D. Prada and S. Muniategui, *Fuel*, 2003, **82**, 1211–1218.
- [67] G. Fodor and K. Kohl, *Energy & fuels*, 1993, **7**, 598–601.
- [68] R. Velvorská, A. Vráblík, M. Fiedlerová and R. Černý, *Chemical Papers*, 2019, **73**, 2987–2993.
- [69] A. Vráblík, R. Velvorská, K. Štěpánek, M. Pšenička, J. M. Hidalgo and R. Černý, *Chemical Engineering & Technology*, 2019, **42**, 735–743.
- [70] S. Liu, S. Wang, C. Hu, S. Zhan, D. Kong and J. Wang, *Spectrochimica Acta Part A: Molecular and Biomolecular Spectroscopy*, 2022, **277**, 121261.
- [71] S. Wang, S. Liu, Y. Yuan, J. Zhang, J. Wang and D. Kong, *Infrared Physics & Technology*, 2020, **104**, 103111.
- [72] A. Palou, A. Miró, M. Blanco, R. Larraz, J. F. Gómez, T. Martínez, J. M. González and M. Alcalà, *Spectrochimica Acta Part A: Molecular and Biomolecular Spectroscopy*, 2017, **180**, 119–126.
- [73] N. Pasadakis, S. Sourligas and C. Foteinopoulos, *Fuel*, 2006, **85**, 1131–1137.
- [74] P. Baptista, P. Felizardo, J. C. Menezes and M. J. N. Correia, *Talanta*, 2008, **77**, 144–151.
- [75] W. Zhang, W. Yuan, X. Zhang and M. Coronado, *Applied Energy*, 2012, **98**, 122–127.
- [76] T. Y. Inan, A. Al-Hajji and O. R. Koseoglu, *Energy & Fuels*, 2016, **30**, 5525–5536.
- [77] H. Chung, M.-S. Ku and J.-S. Lee, *Vibrational spectroscopy*, 1999, **20**, 155–163.
- [78] M. V. Rebouças and B. de Barros Neto, *Journal of Near Infrared Spectroscopy*, 2001, **9**, 263–273.
- [79] F. B. Gonzaga and C. Pasquini, *Analytica Chimica Acta*, 2010, **670**, 92–97.
- [80] D. Honigs, T. Hirschfeld and G. Hieftje, *Analytical Chemistry*, 1985, **57**, 443–445.
- [81] F. A. Honorato, B. de Barros Neto, M. F. Pimentel, L. Stragevitch and R. K. H. Galvão, *Fuel*, 2008, **87**, 3706–3709.
- [82] P. Mishra, F. Marini, A. Biancolillo and J.-M. Roger, *Talanta*, 2021, **223**, 121693.
- [83] C. Chen, R. Liang, S. Xia, D. Hou, B. Abdoulaye, J. Tao, B. Yan, Z. Cheng and G. Chen, *Fuel*, 2023, **332**, 126177.
- [84] C. Chen, R. Liang, Y. Ge, J. Li, B. Yan, Z. Cheng, J. Tao, Z. Wang, M. Li and G. Chen, *Renewable Energy*, 2022, **194**, 220–231.
- [85] M. A. Mayer, 2021.
- [86] A. Dalmiya, M. Sheyyab, E. K. Mayhew, K. Brezinsky and P. T. Lynch, Turbo Expo: Power for Land, Sea, and Air, 2023, p. V004T05A028.

- [87] S. Alizadeh, S. Ta, L. Samavedham and A. K. Ray, *The Canadian Journal of Chemical Engineering*, 2023, **101**, 6203–6214.
- [88] K. R. Bukkarapu and A. Krishnasamy, *Energy & Fuels*, 2021, **35**, 7993–8005.
- [89] H. Wang, X. Chu, P. Chen, J. Li, D. Liu and Y. Xu, *Fuel*, 2022, **309**, 122224.
- [90] K. He, M. Zhong, Z. Li and J. Liu, *Control Engineering Practice*, 2020, **101**, 104478.
- [91] C. L. Cunha, A. R. Torres and A. S. Luna, *Fuel*, 2020, **261**, 116344.
- [92] M. Mohammadi, M. K. Khorrami, A. Vatani, H. Ghasemzadeh, H. Vatanparast, A. Bahramian and A. Fallah, *Spectrochimica Acta Part A: Molecular and Biomolecular Spectroscopy*, 2020, **232**, 118157.
- [93] D. Ambre, M. Sheyyab, P. Lynch, E. K. Mayhew and K. Brezinsky, *Talanta*, 2024, **271**, 125635.
- [94] K. P. J. Williams, R. E. Aries, D. J. Cutler and D. P. Lidiard, *Analytical Chemistry*, 1990, **62**, 2553–2556.
- [95] F. Akulich, H. Anahideh, M. Sheyyab and D. Ambre, *Chemometrics and Intelligent Laboratory Systems*, 2022, **225**, 104572.
- [96] J. B. Cooper, K. L. Wise, J. Groves and W. T. Welch, *Analytical Chemistry*, 1995, **67**, 4096–4100.
- [97] P. E. Flecher, W. T. Welch, S. Albin and J. B. Cooper, *Spectrochimica Acta Part A: Molecular and Biomolecular Spectroscopy*, 1997, **53**, 199–206.
- [98] C. J. de Bakker and P. M. Fredericks, *Applied spectroscopy*, 1995, **49**, 1766–1771.
- [99] J. Andrade, S. Garrigues, M. De la Guardia, M. Gómez-Carracedo and D. Prada, *Analytica chimica acta*, 2003, **482**, 115–128.
- [100] T. Bolanca, S. Marinovi, S. Ukić, A. Jukić and V. Rukavina, *Acta Chim. Slov.*, 2012, **59**, 249–257.
- [101] V. O. Santos, F. C. Oliveira, D. G. Lima, A. C. Petry, E. Garcia, P. A. Suarez and J. C. Rubim, *Analytica Chimica Acta*, 2005, **547**, 188–196.
- [102] S. Marinović, M. Krištović, B. Špehar, V. Rukavina and A. Jukić, *Journal of analytical chemistry*, 2012, **67**, 939–949.
- [103] R. Velvarská, M. Fiedlerová, D. Kadlec and K. Štěpánek, *International Journal of Industrial Chemistry*, 2020, **11**, 187–194.
- [104] K. J. Johnson, R. E. Morris and S. L. Rose-Pehrsson, *Energy & fuels*, 2006, **20**, 727–733.
- [105] M. Voigt, R. Legner, S. Haefner, A. Friesen, A. Wirtz and M. Jaeger, *Fuel*, 2019, **236**, 829–835.
- [106] J. A. Cramer, K. E. Kramer, K. J. Johnson, R. E. Morris and S. L. Rose-Pehrsson, *Chemometrics and Intelligent Laboratory Systems*, 2008, **92**, 13–21.
- [107] K. E. Kramer, R. E. Morris, S. L. Rose-Pehrsson, J. Cramer and K. J. Johnson, *Energy & fuels*, 2008, **22**, 523–534.
- [108] A. Abraham, D. Patel, A. Dalmiya, A. Sutar, H. Okada, D. Ambre, M. Sheyyab, K. Brezinsky, S. Sanders and P. T. Lynch, *AIAA SCITECH 2024 Forum*, 2024, p. 1244.
- [109] M.-S. Ku and H. Chung, *Applied spectroscopy*, 1999, **53**, 557–564.
- [110] H. Chung and M.-S. Ku, *Applied spectroscopy*, 2000, **54**, 239–245.
- [111] H. Okada and S. T. Sanders, *IEEE Sensors Journal*, 2022, **22**, 16046–16054.
- [112] I. Litani-Barzilai, I. Sela, V. Bulatov, I. Zilberman and I. Schechter, *Analytica Chimica Acta*, 1997, **339**, 193–199.
- [113] J. Tao, J. Zhu, C. Chen, X. Zhu, B. Yan, Z. Cheng and G. Chen, *Renewable Energy*, 2025, **253**, 123499.
